# Supplementary material for: Enterotypes of the Gut Microbial Community and Their Response to Plant Secondary Compounds in Plateau Pikas
Source: PubMed Central journal article supplement (PMC7563992; doi:10.3390/microorganisms8091311), 2020-08-28
Supplement: microorganisms-08-01311-s001.pdf [file microorganisms-08-01311-s001.pdf]

**Figure S1.** CH index based on the Bray-Curtis and Jaccard distance metrics.

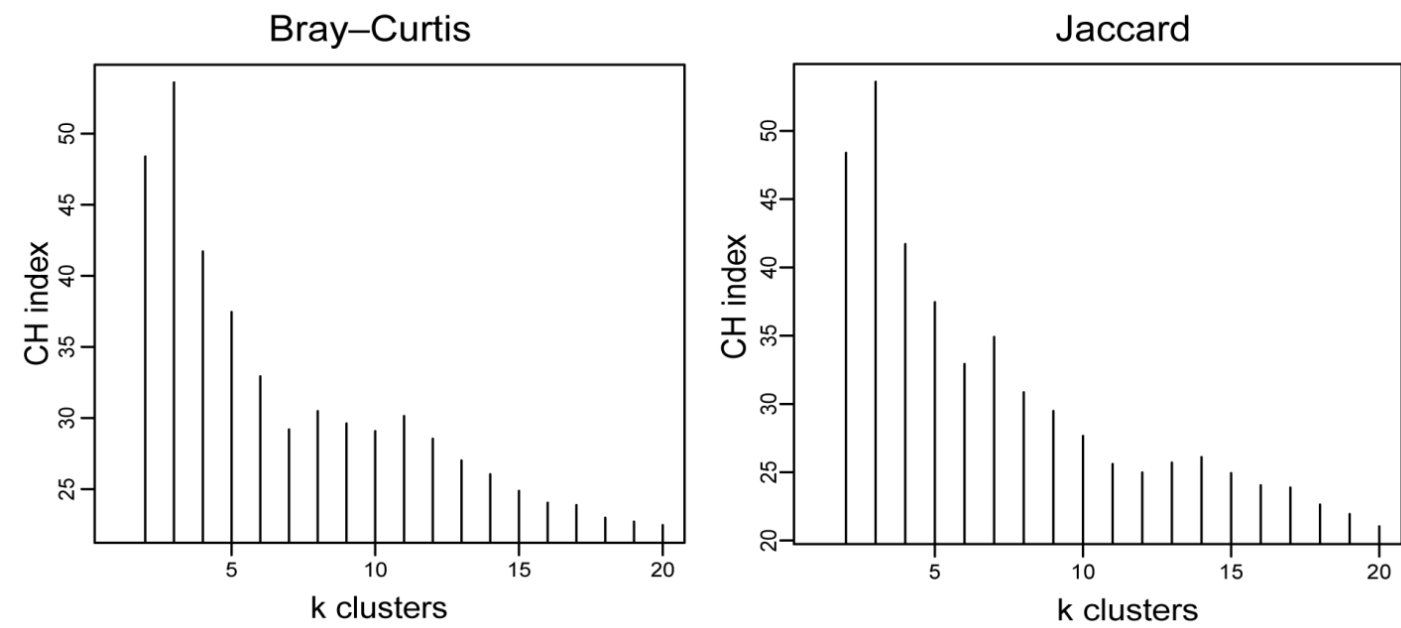

**Table S1.** Main components of the pika feed.

|            | Main food material                                                                                                                                                                                                                                                                                                                                                       | Main nutrition contents                                                                                                                                                                       |
|------------|--------------------------------------------------------------------------------------------------------------------------------------------------------------------------------------------------------------------------------------------------------------------------------------------------------------------------------------------------------------------------|-----------------------------------------------------------------------------------------------------------------------------------------------------------------------------------------------|
| Laboratory | <i>Zea mays</i> , Soybean meal, Lucerne meal, Salt, Dicalcium phosphate, Mountain flour, et al.                                                                                                                                                                                                                                                                          | Crude protein: 16.6%<br>Crude fat: 3.1%<br>Crude fiber: 11.2%<br>Crude ash: 8.5%<br>Nitrogen-free extract: 52.8%                                                                              |
| Natural    | <b>July:</b> <i>Elymus nutans</i> , <i>Festuca ovina</i> , <i>Poa annua</i> , <i>Kobresia humilis</i> , <i>Potentilla anserina</i> , <i>Oxytropis ochrocephala</i> , et al.<br><b>November:</b> <i>Elymus nutans</i> , <i>Oxytropis ochrocephala</i> , <i>Kobresia humilis</i> , <i>Scirpus distigmaticus</i> , <i>Poa annua</i> , <i>Leontopodium pusillum</i> , et al. | <b>July:</b> Crude protein: 13.3%<br>Crude fat: 2.3%<br>Crude fiber: 25.0%<br>Lignin: 19.3%<br><b>November:</b> Crude protein: 8.0%<br>Crude fat: 4.2%<br>Crude fiber: 22.0%<br>Lignin: 19.9% |

**Table S2.** Distribution of enterotypes with respect to sampling time.

| Sampling time | E1 | E2 | E3 |
|---------------|----|----|----|
| July 2015     | 1  | 8  | 0  |
| July 2016     | 8  | 4  | 1  |
| January 2017  | 4  | 8  | 0  |
| April 2017    | 1  | 12 | 0  |
| July 2017     | 3  | 7  | 16 |
| November 2017 | 9  | 3  | 0  |
| January 2018  | 1  | 19 | 0  |
| April 2018    | 7  | 1  | 5  |
| July 2018     | 6  | 2  | 0  |

**Table S3.** Network indices of three enterotypes in plateau pikas.

| Network indices                | E1    | E2    | E3     |
|--------------------------------|-------|-------|--------|
| No. of samples                 | 40    | 64    | 22     |
| Total nodes                    | 20    | 17    | 18     |
| Total links                    | 45    | 20    | 24     |
| Positive links                 | 32    | 14    | 11     |
| Negative links                 | 13    | 6     | 13     |
| Links per node                 | 2.250 | 1.176 | 1.333  |
| Average Degree                 | 4.500 | 2.353 | 2.667  |
| Average Weighted Degree        | 2.186 | 0.834 | -0.038 |
| Diameter                       | 5     | 7     | 6      |
| Average path length            | 2.216 | 2.925 | 2.779  |
| Density                        | 0.237 | 0.147 | 0.157  |
| Average Clustering Coefficient | 0.411 | 0.192 | 0.451  |
| Total triangles                | 31    | 3     | 7      |

**Table S4.** Contribution of hierarchical functional categories (KEGG pathway levels 2 and 3) to total variance among the three enterotypes. Values were calculated via the SIMPER method.

| Level   | E1 vs E2                                    |                          | E1 vs E3                                       |                          | E2 vs E3                                       |                          |
|---------|---------------------------------------------|--------------------------|------------------------------------------------|--------------------------|------------------------------------------------|--------------------------|
|         | Pathways                                    | Contribution to variance | Pathways                                       | Contribution to variance | Pathways                                       | Contribution to variance |
| Level 2 | Carbohydrate metabolism                     | 0.127                    | Amino acid metabolism                          | 0.164                    | Carbohydrate metabolism                        | 0.130                    |
|         | Amino acid metabolism                       | 0.118                    | Replication and repair                         | 0.107                    | Cell motility                                  | 0.098                    |
|         | Membrane transport                          | 0.093                    | Membrane transport                             | 0.092                    | Membrane transport                             | 0.081                    |
|         | Cell motility                               | 0.081                    | Cell motility                                  | 0.078                    | Replication and repair                         | 0.079                    |
|         | Xenobiotics biodegradation and metabolism   | 0.060                    | Genetic information processing                 | 0.060                    | Genetic information processing                 | 0.072                    |
| Level 3 | Transporters                                | 0.041                    | DNA repair and recombination proteins          | 0.048                    | Transporters                                   | 0.043                    |
|         | Glycolysis / Gluconeogenesis                | 0.037                    | Transporters                                   | 0.048                    | Glycolysis / Gluconeogenesis                   | 0.038                    |
|         | Amino acid related enzymes                  | 0.032                    | Amino acid related enzymes                     | 0.047                    | DNA repair and recombination proteins          | 0.037                    |
|         | Butanoate metabolism                        | 0.028                    | ABC transporters                               | 0.031                    | Bacterial motility proteins                    | 0.037                    |
|         | ABC transporters                            | 0.027                    | Replication, recombination and repair proteins | 0.029                    | Replication, recombination and repair proteins | 0.030                    |
|         | Bacterial motility proteins                 | 0.026                    | Bacterial motility proteins                    | 0.029                    | ABC transporters                               | 0.027                    |
|         | Alanine, aspartate and glutamate metabolism | 0.022                    | Alanine, aspartate and glutamate metabolism    | 0.024                    | Butanoate metabolism                           | 0.025                    |
|         | General function prediction only            | 0.021                    | Secretion system                               | 0.020                    | Flagellar assembly                             | 0.021                    |
|         | Fatty acid metabolism                       | 0.019                    | Glycine, serine and threonine metabolism       | 0.018                    | Secretion system                               | 0.020                    |
|         | Secretion system                            | 0.017                    | Flagellar assembly                             | 0.017                    | Fatty acid metabolism                          | 0.018                    |
